# Supplementary figures and images for: Lipoteichoic acid from Bifidobacterium animalis subsp. lactis BPL1: a novel postbiotic that reduces fat deposition via IGF‐1 pathway
Source: PubMed Central journal article supplement — Microb Biotechnol. 2021 Feb 23;15(3):805–16. doi: 10.1111/1751-7915.13769 (PMC8913875; doi:10.1111/1751-7915.13769), 2021-02-23

**A**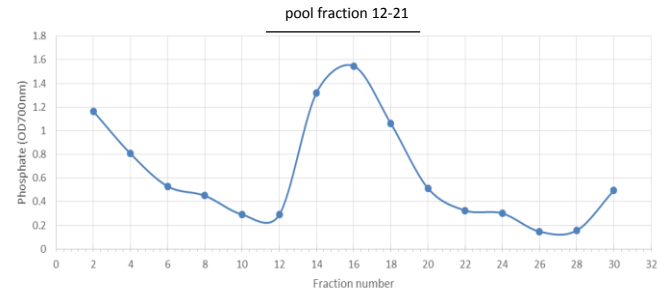**B**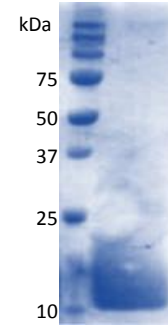**C**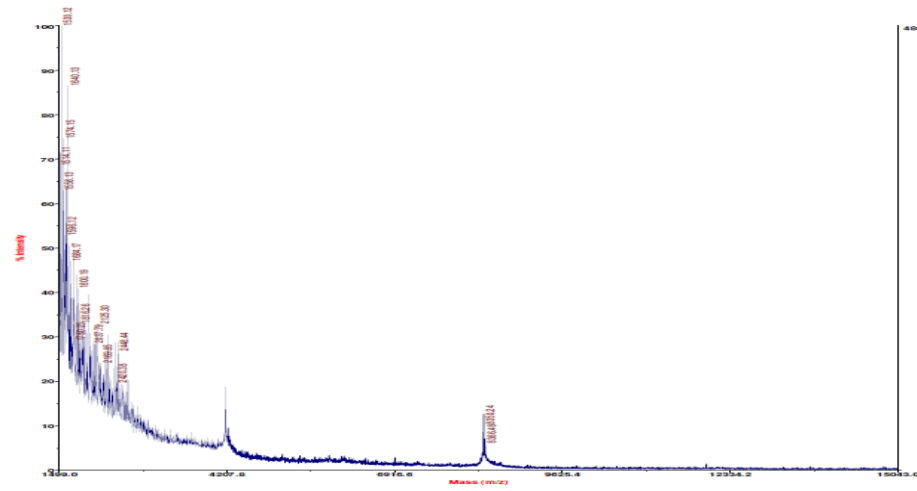**D**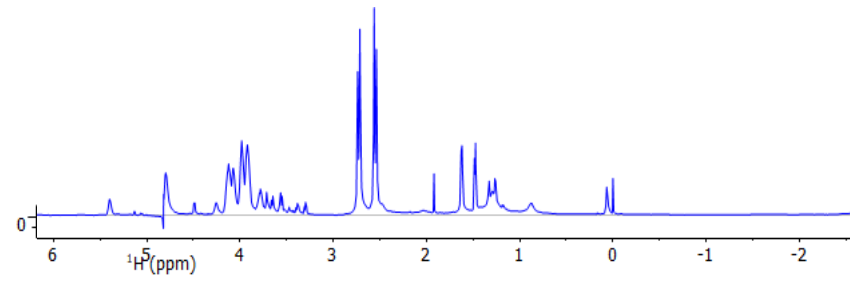

Supplement: MBT2-15-805-s001.pdf [file MBT2-15-805-s001.pdf]
